# Supplementary material for: Impact of Root Rot Disease of Zanthoxylum armatum on Rhizosphere Soil Microbes and Screening of Antagonistic Bacteria
Source: MDPI journal article supplement (doi:10.3390/f14081561), 2023-07-31
Supplement: s1 [file s1]

Archive with 1 entries (1 files):
- forests-2517827-supplementary.pdf
