# Supplementary material for: Impact of Root Rot Disease of Zanthoxylum armatum on Rhizosphere Soil Microbes and Screening of Antagonistic Bacteria
Source: MDPI journal article supplement (doi:10.3390/f14081561), 2023-07-31
Supplement: s1 [file s1 › forests-2517827-supplementary.pdf]

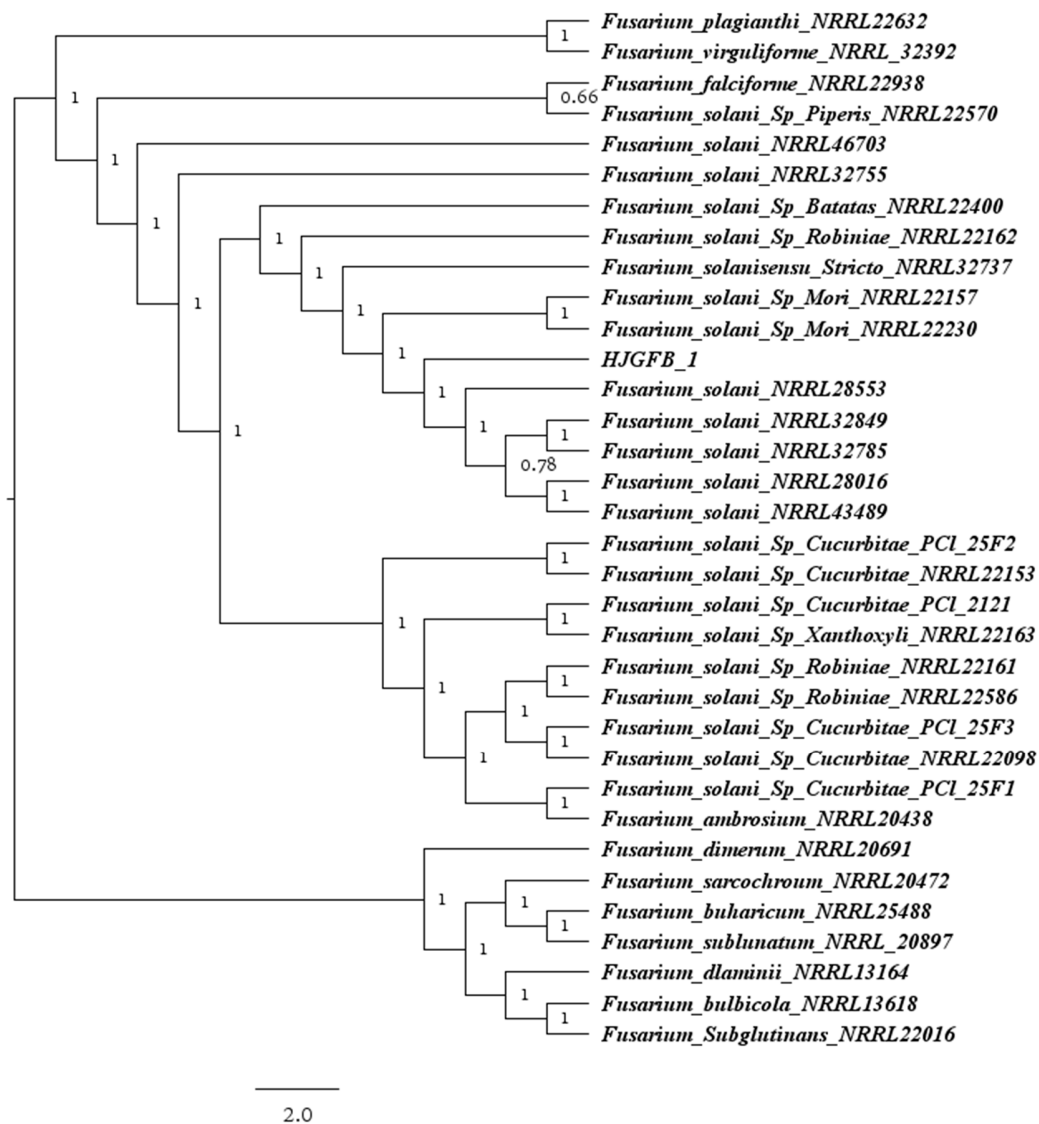

Figure S1. Construction of Phylogenetic Tree by Combining Multiple Genes of HJGFB-1 strain. Phylogenetic tree inferred from the combined datasets (ITS, TEF, TUB, and RBP2) from members of the *F. solani* species analyzed. The evolutionary history was inferred by using the Bayesian Inference (BI) analyses, using *Fusarium plagianthi* NRRL22632 and *Fusarium vinguliforme* NRRL 32392 as the outgroup taxon.
