# Supplementary figures and images for: Impact of Root Rot Disease of Zanthoxylum armatum on Rhizosphere Soil Microbes and Screening of Antagonistic Bacteria
Source: MDPI journal article supplement (doi:10.3390/f14081561), 2023-07-31

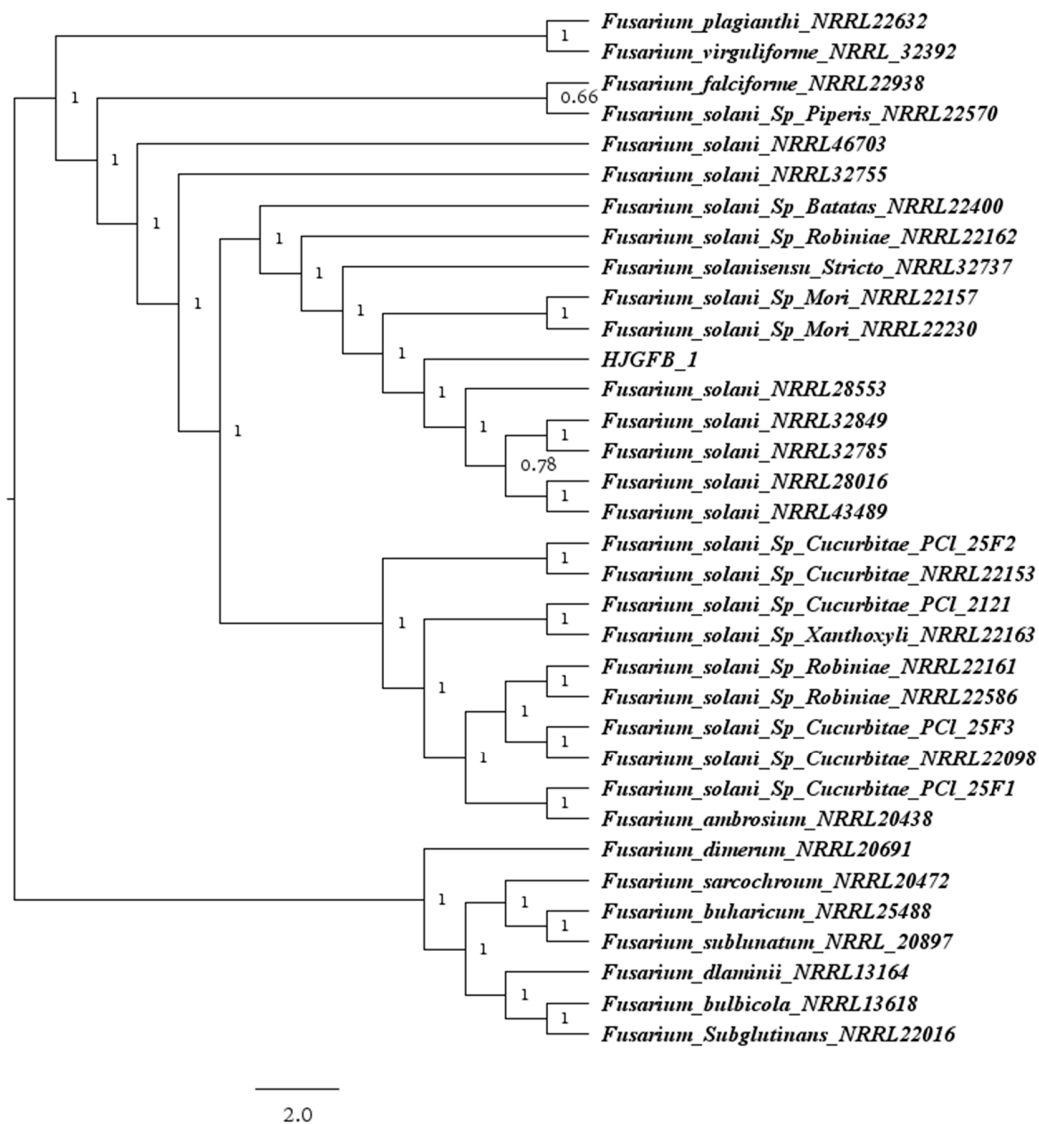

Supplement: s1 [file s1]
